# Supplementary material for: Comprehensive performance comparison of high-resolution array platforms for genome-wide Copy Number Variation (CNV) analysis in humans
Source: PubMed Central journal article supplement (PMC5402652; doi:10.1186/s12864-017-3658-x), 2017-04-24

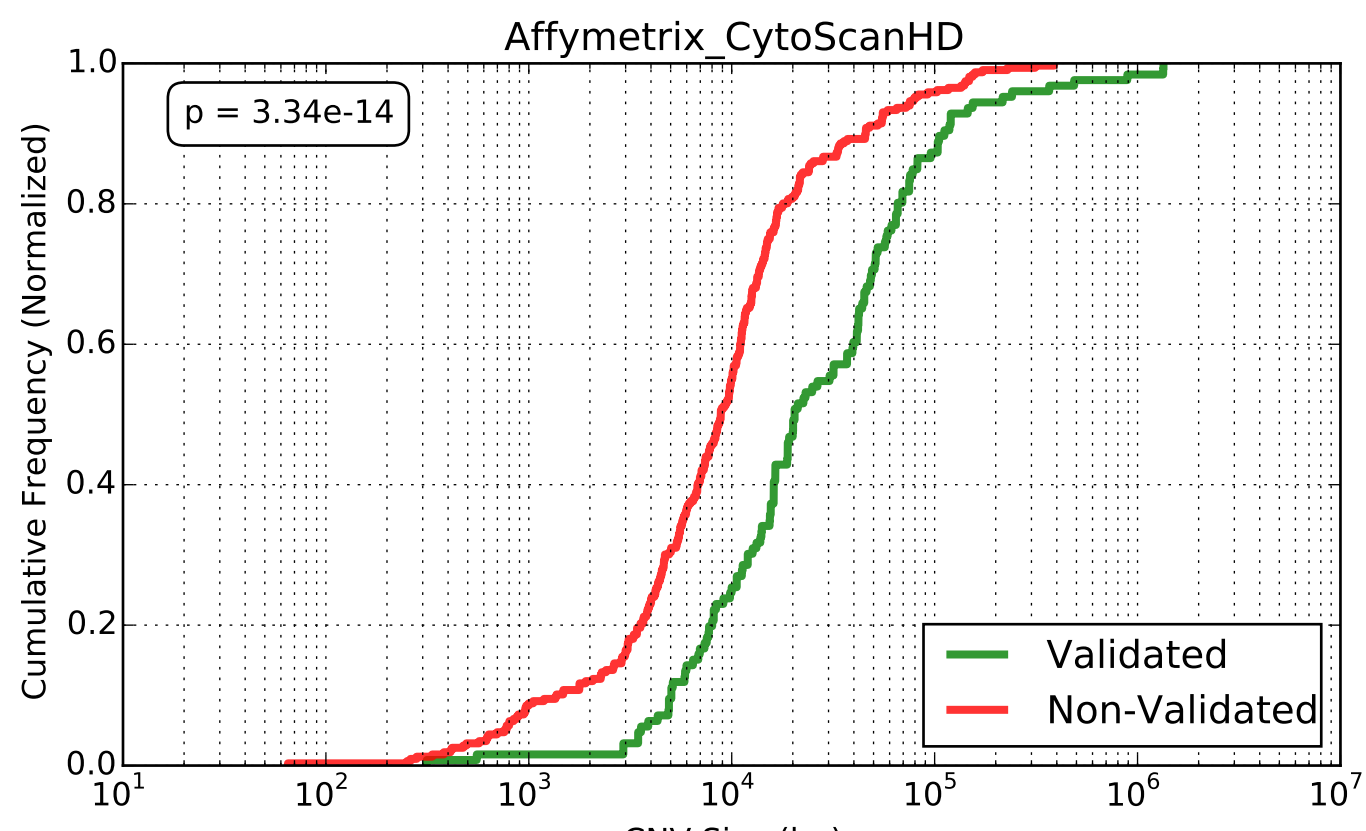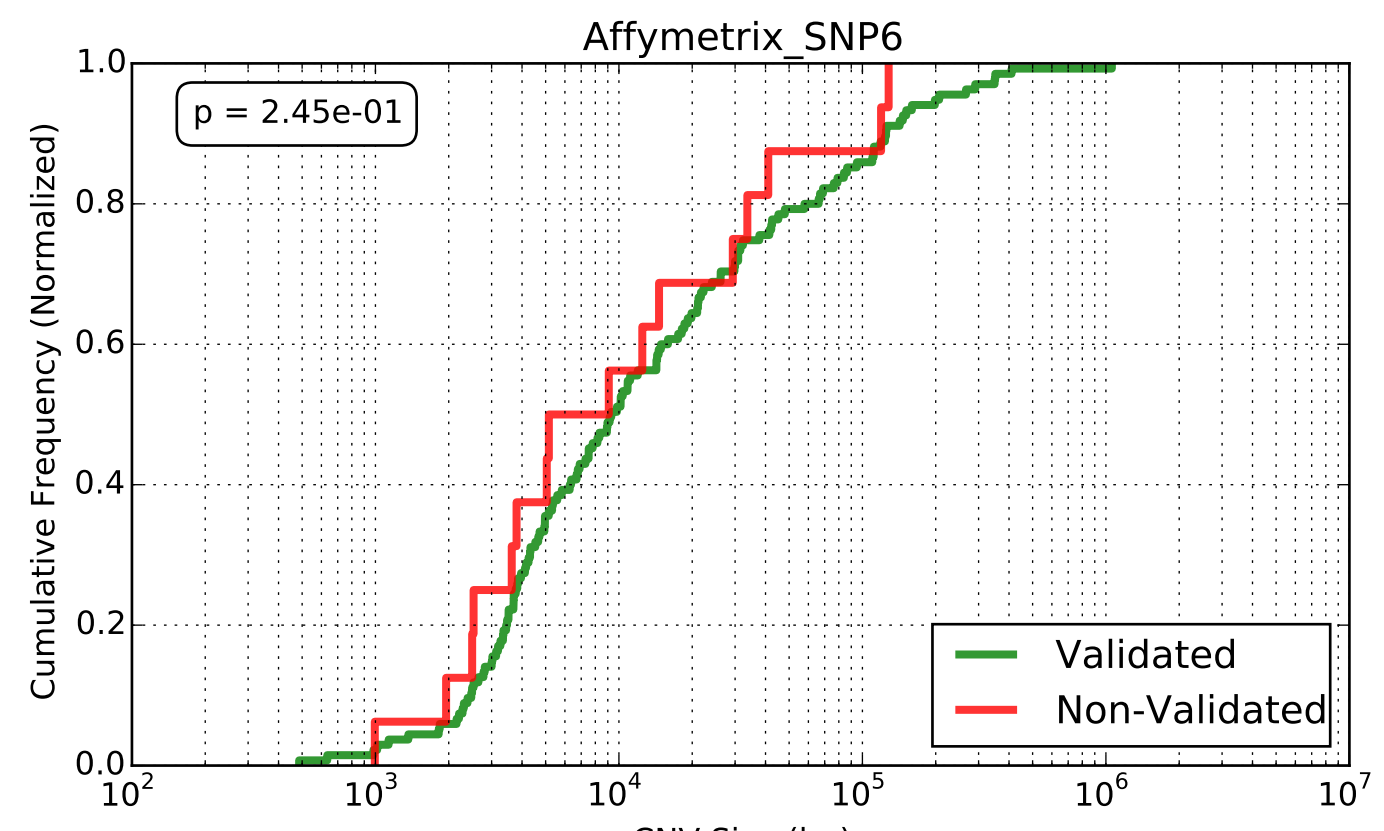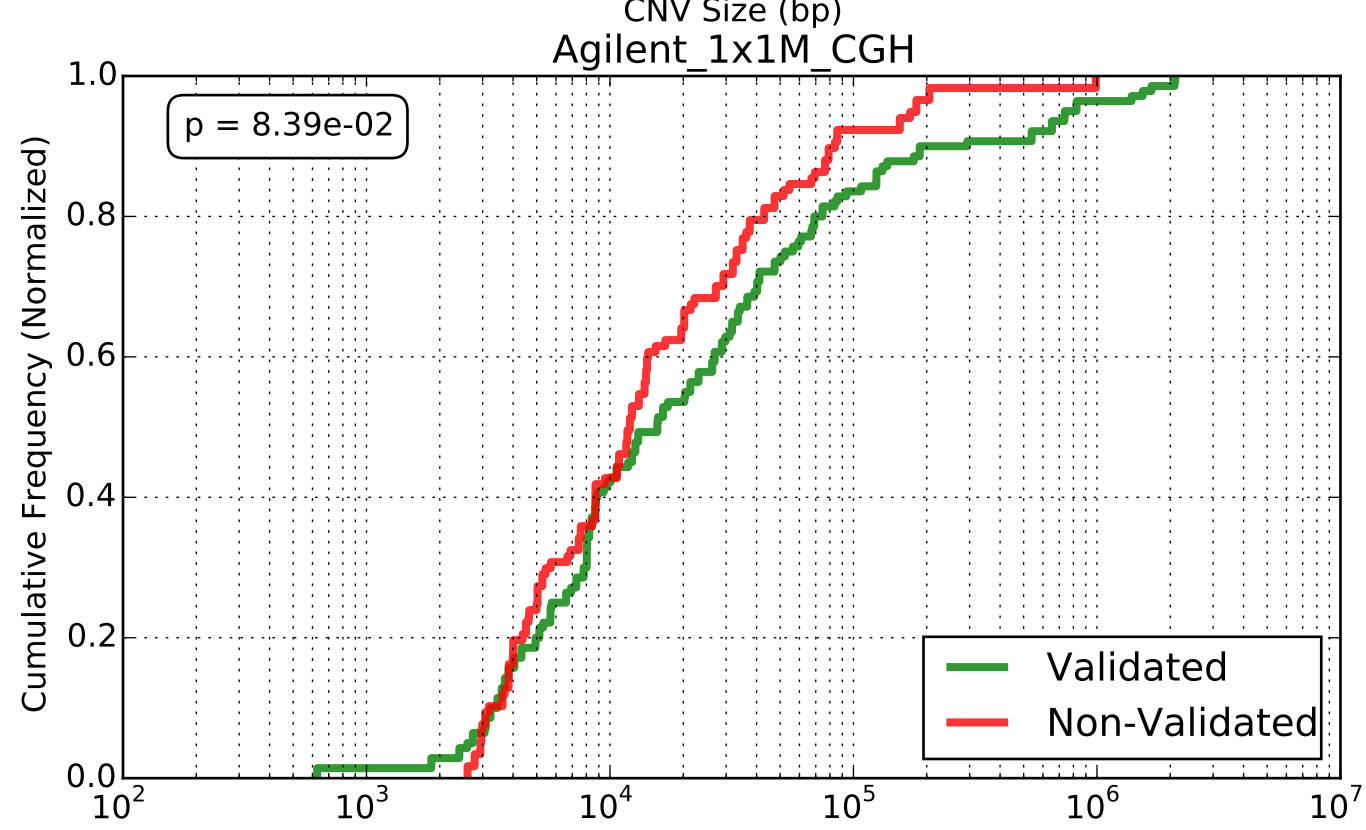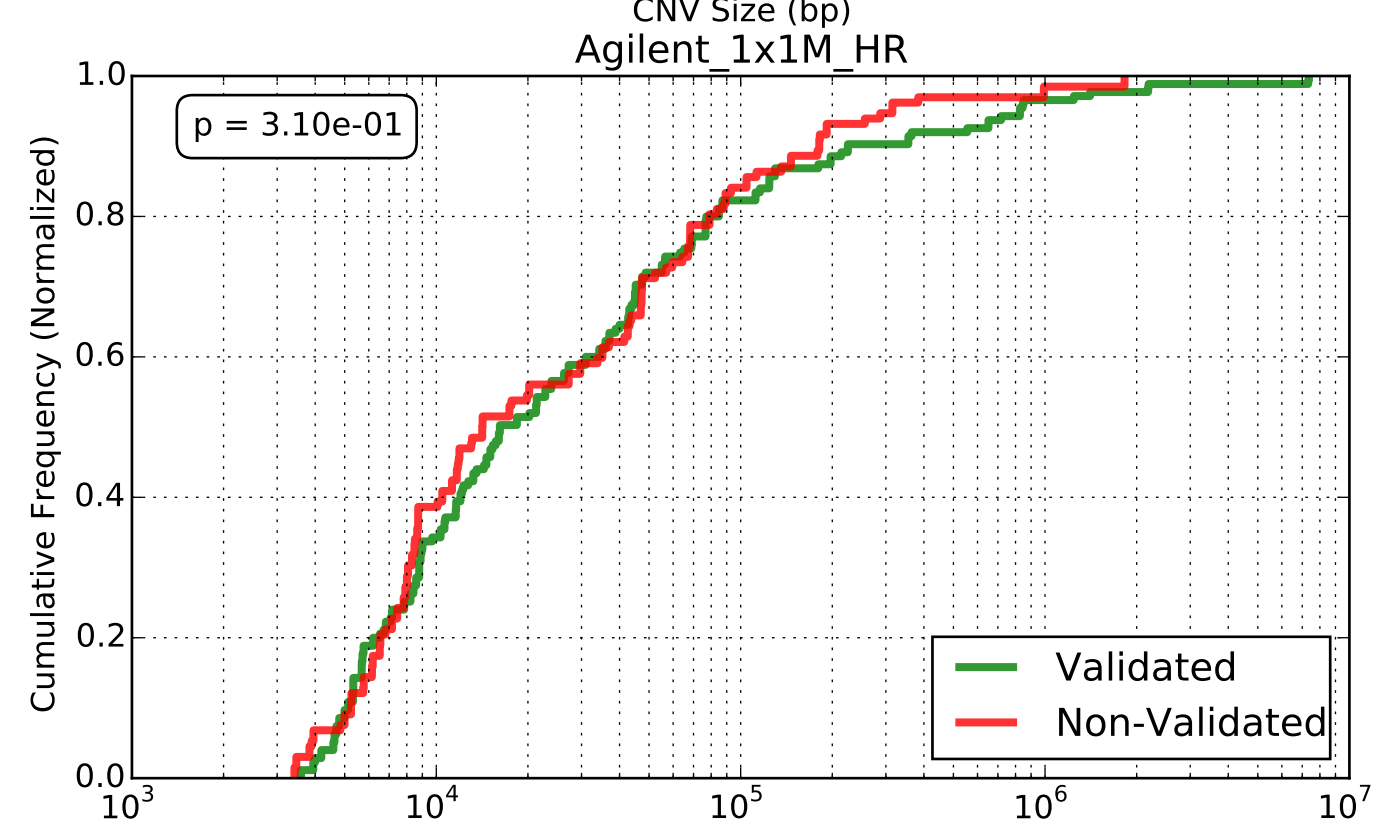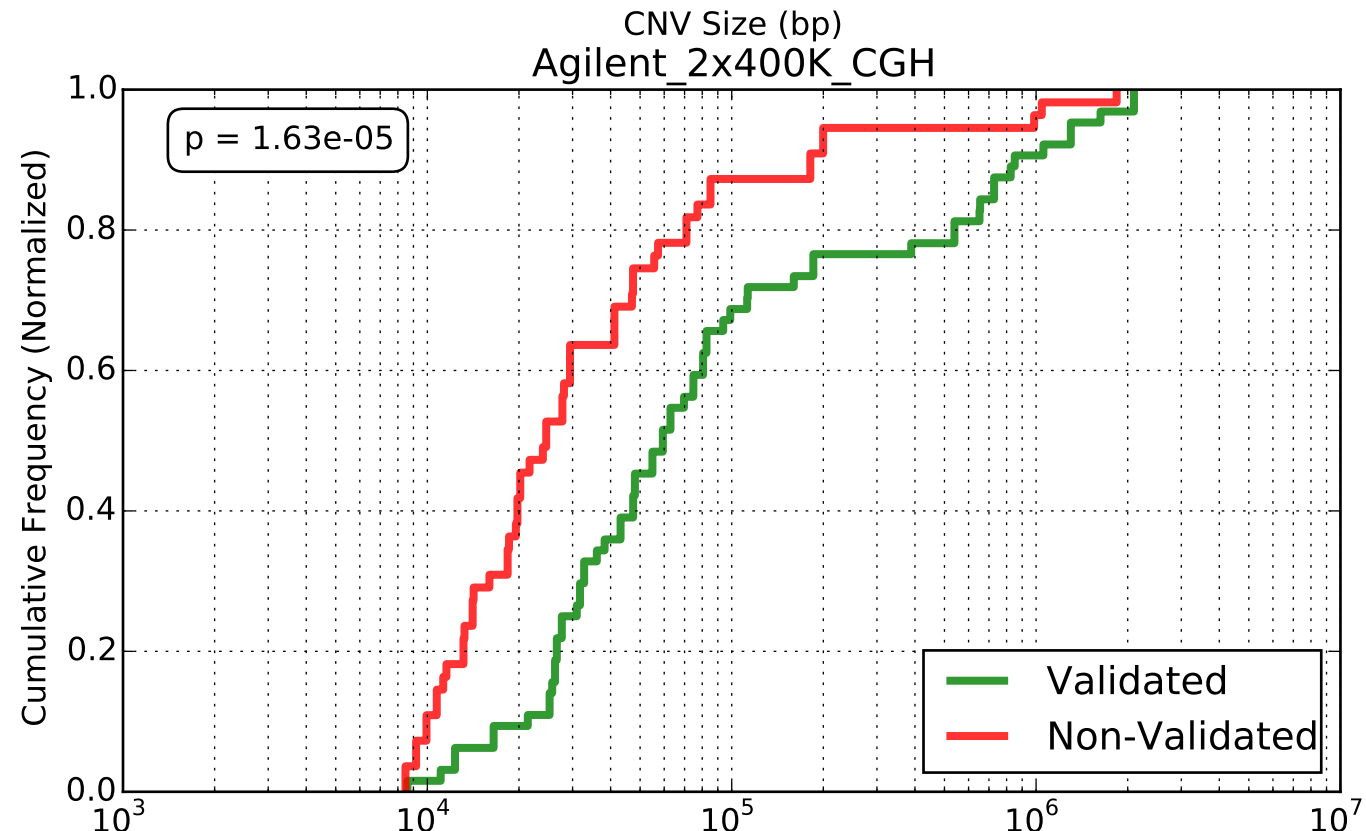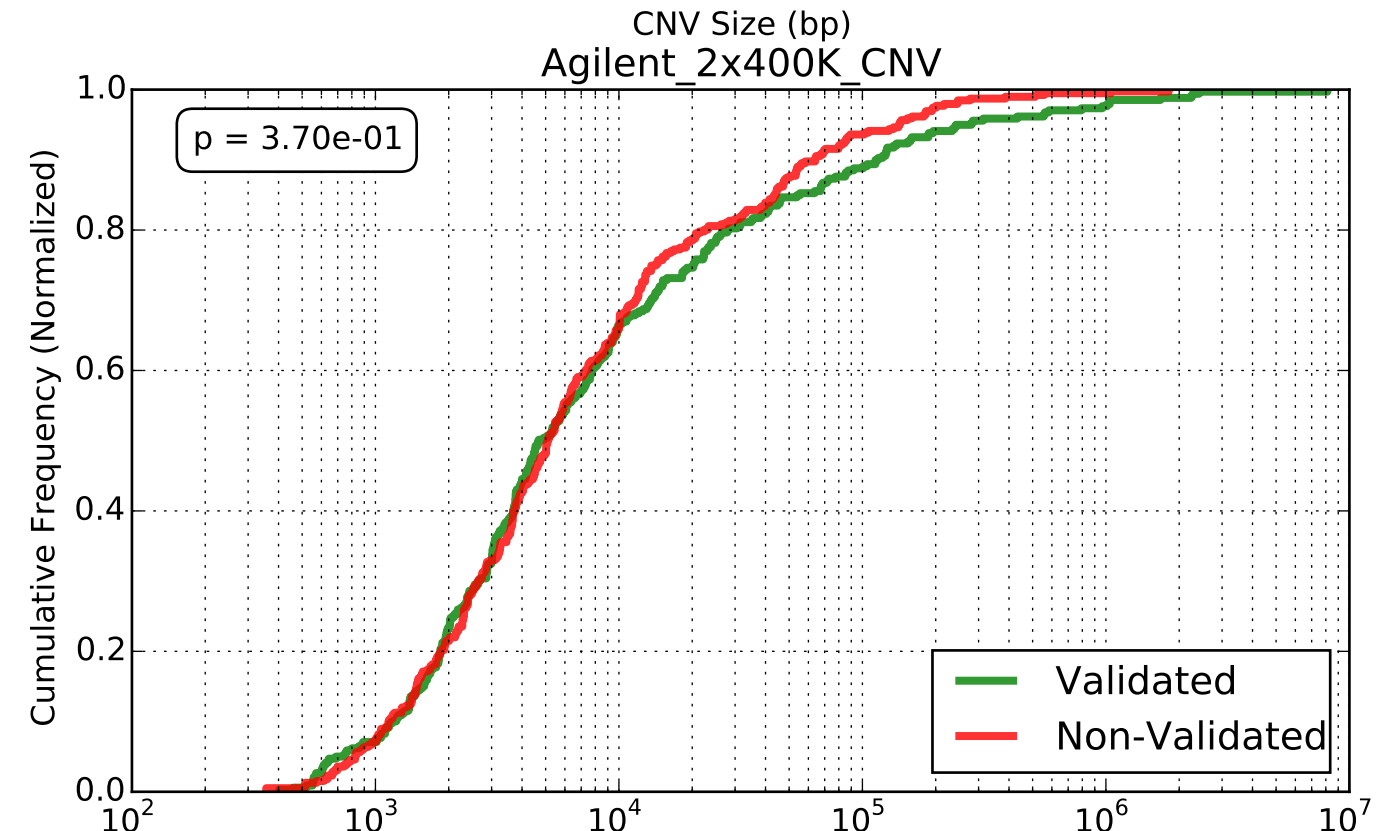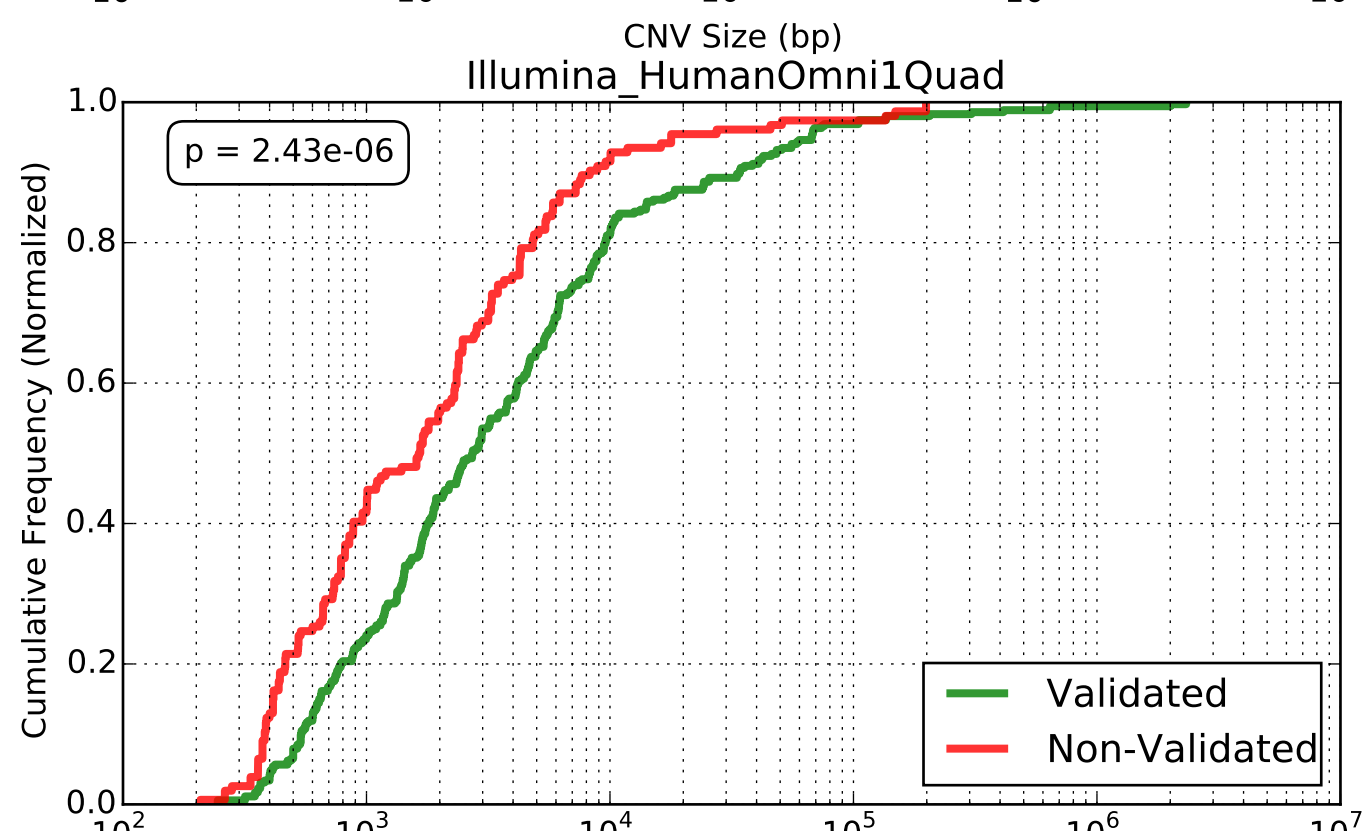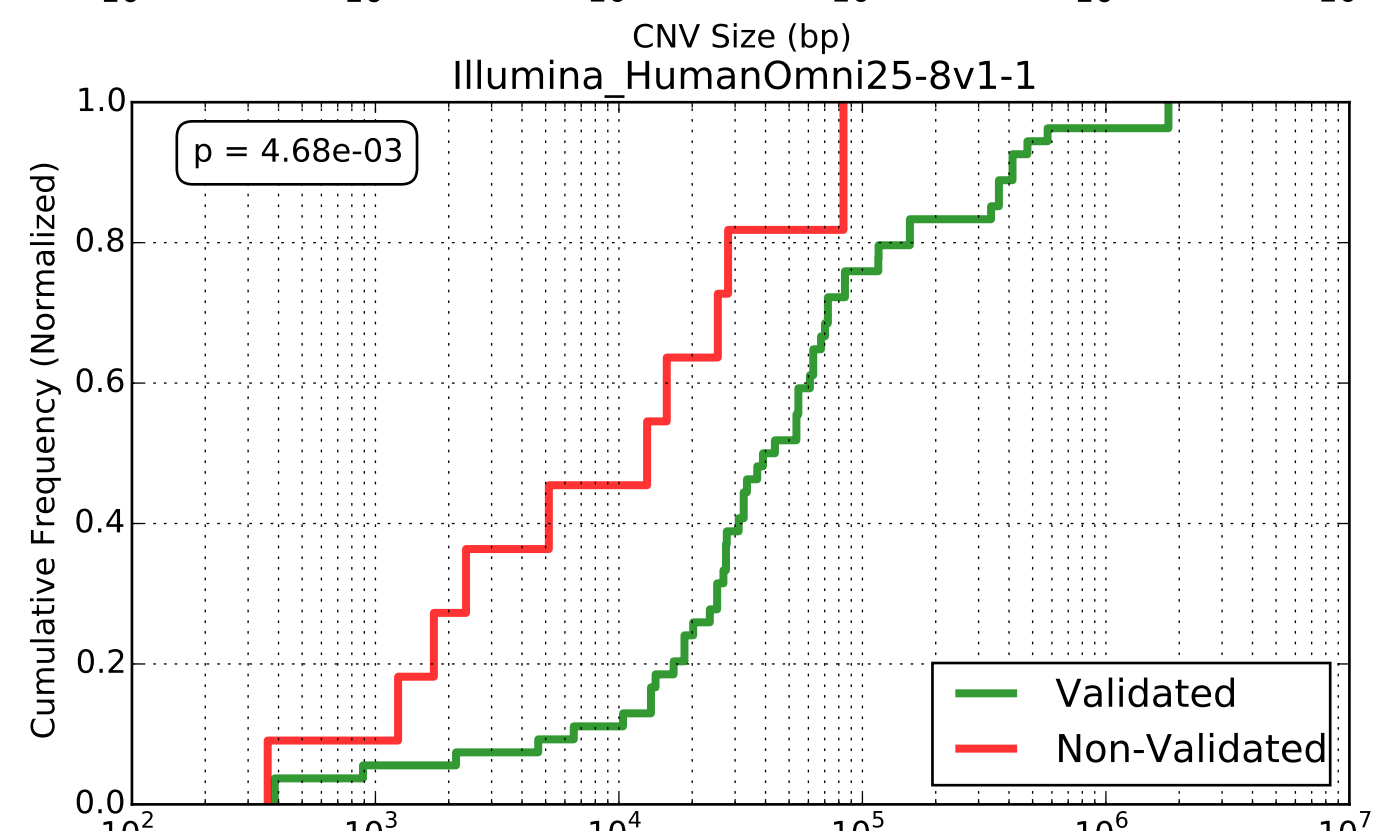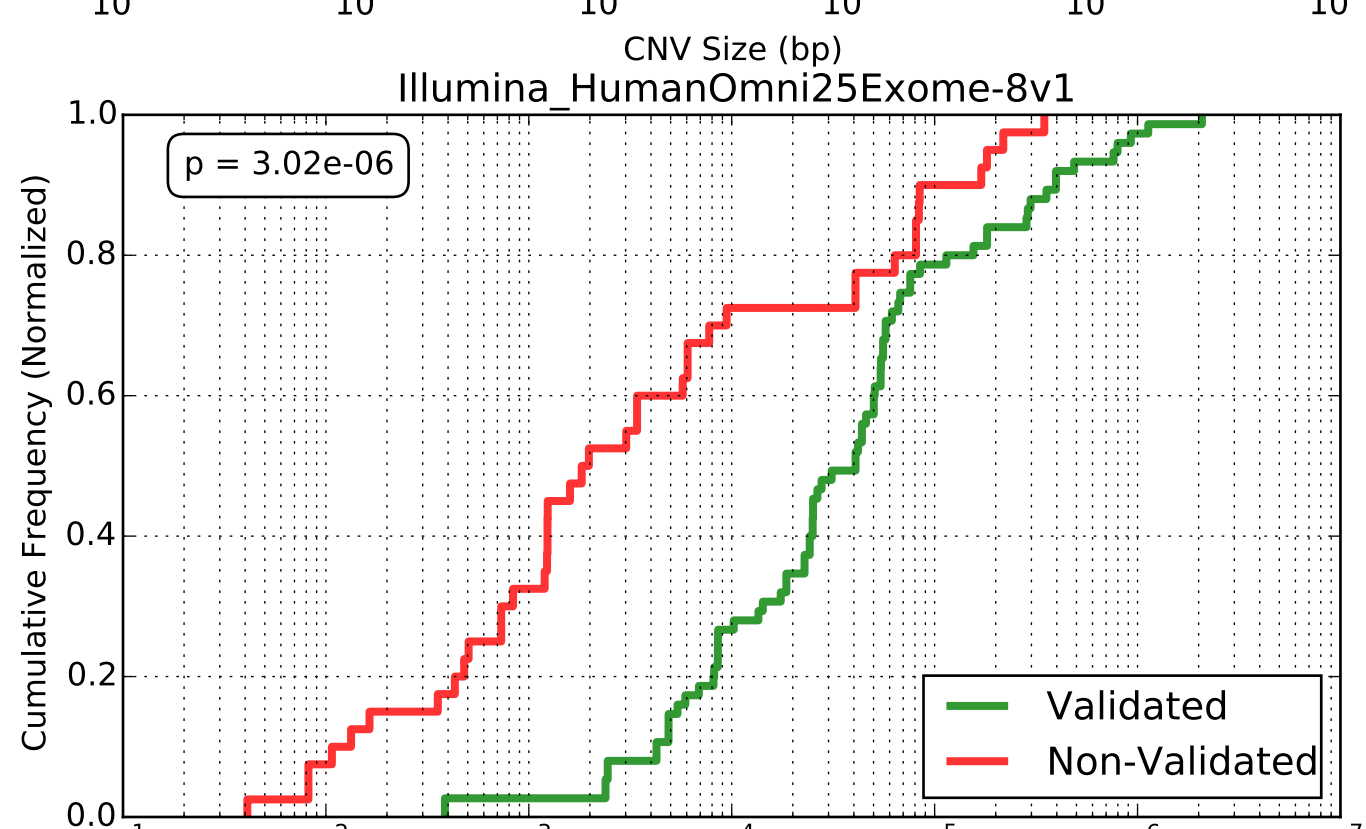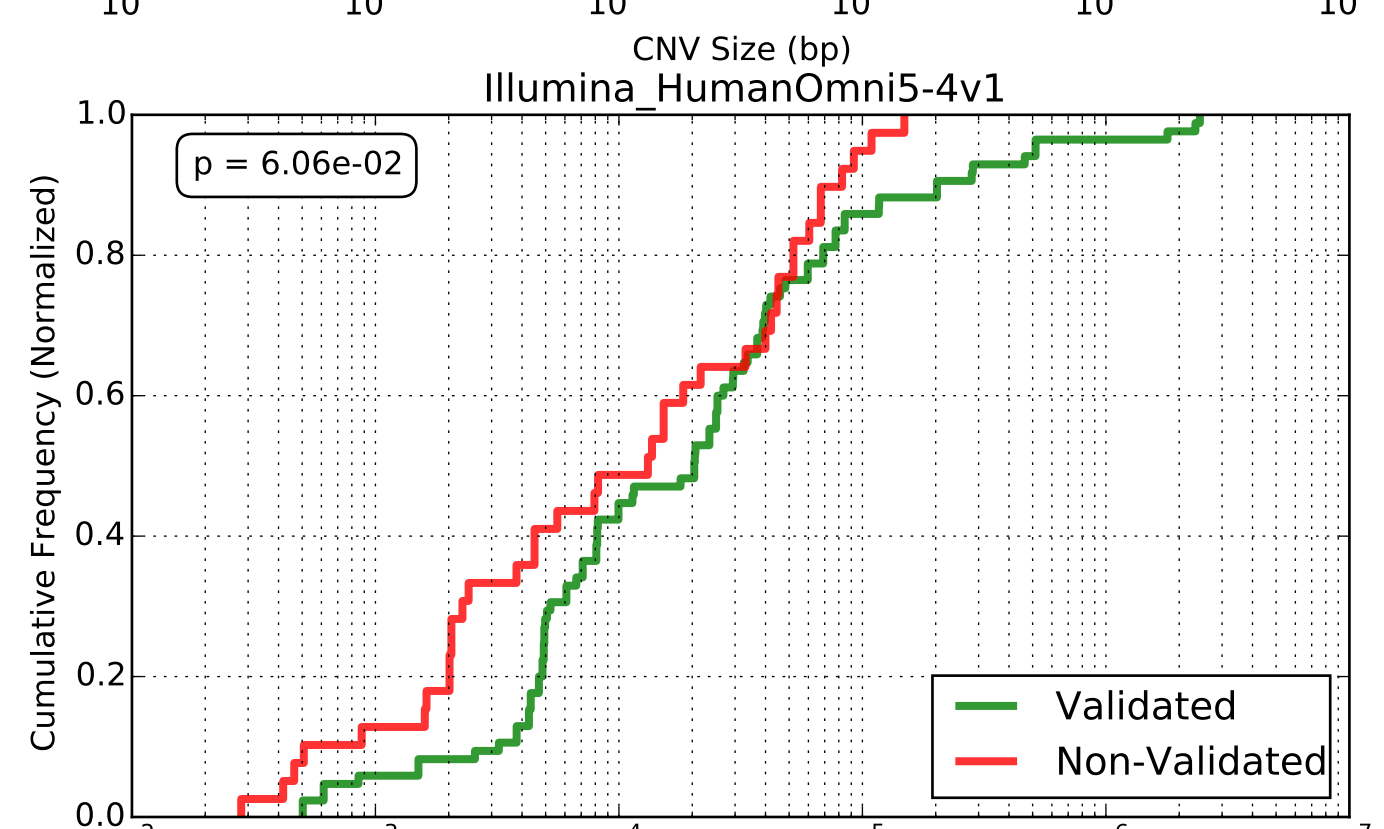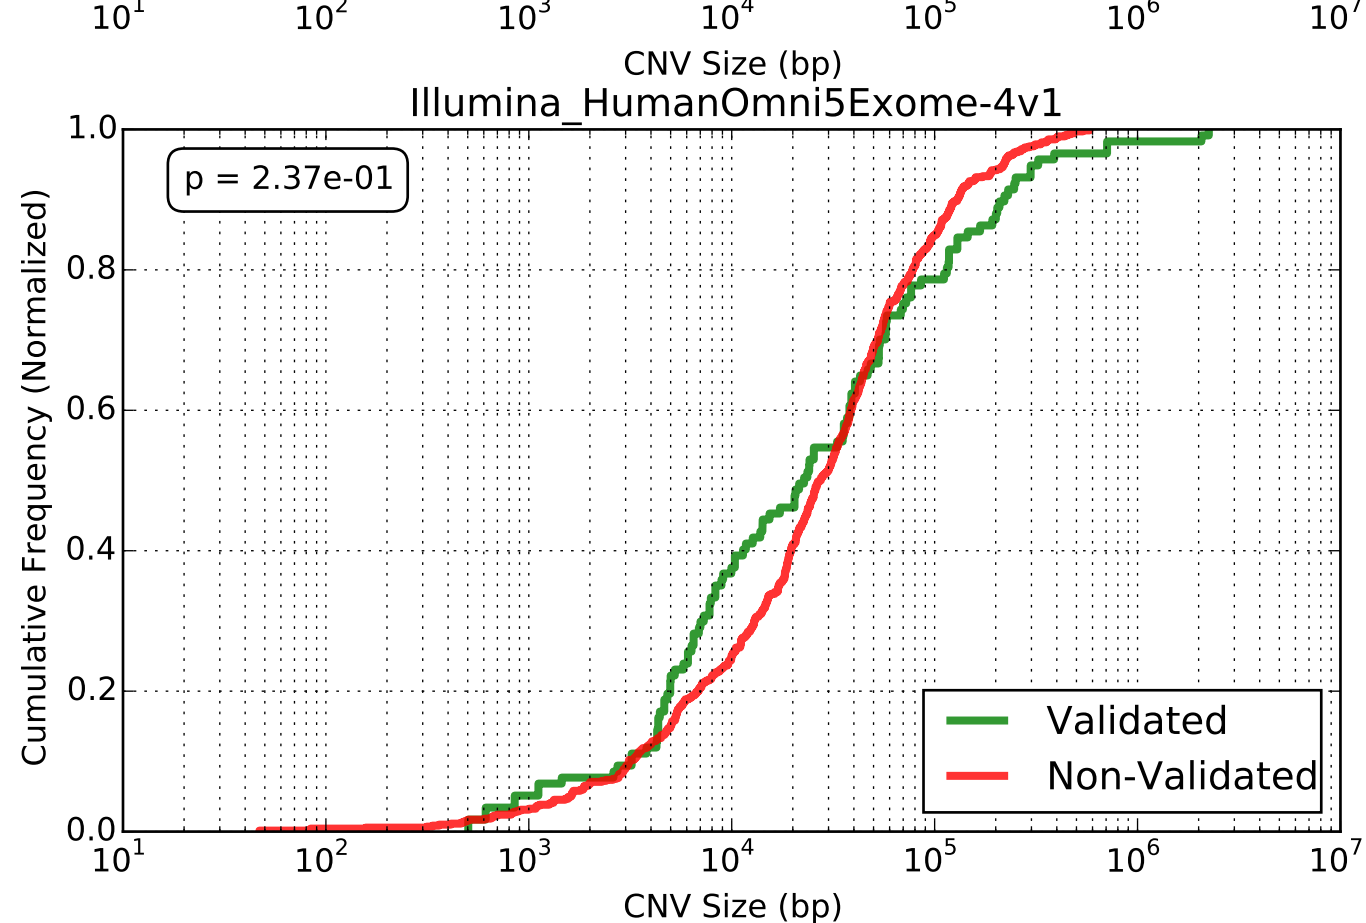

Supplement: 12864_2017_3658_MOESM3_ESM.pdf [file 12864_2017_3658_MOESM3_ESM.pdf]
